# Supplementary material
Source: PubMed Central journal article supplement (PMC7902418)
Supplement: NIHMS1645451-supplement-Supplementary_Info.pdf [file NIHMS1645451-supplement-Supplementary_Info.pdf]

## Supplementary Information

### Contents:

|                                                                                                  |    |
|--------------------------------------------------------------------------------------------------|----|
| Supplementary Methods .....                                                                      | 2  |
| Mendelian randomization analysis .....                                                           | 2  |
| Additional and sensitivity analyses .....                                                        | 3  |
| Supplementary Table S1: ICD-10 codes for clinical conditions from the hospital inpatient data .. | 4  |
| Supplementary Figure S1: Cohort flowchart .....                                                  | 5  |
| Supplementary Results .....                                                                      | 6  |
| Seasonal variation in vitamin D.....                                                             | 6  |
| Supplementary Table S2: vitamin D levels associated with assessment month .....                  | 6  |
| Supplementary Figure S2: Boxplot of vitamin D by assessment month.....                           | 6  |
| Vitamin D variation and assessment centre .....                                                  | 7  |
| Supplementary Table S3: Vitamin D variation by assessment centre .....                           | 7  |
| Vitamin D variation and self-reported ethnic group.....                                          | 8  |
| Supplementary Table S4: UK Biobank ethnic group coding.....                                      | 8  |
| Supplementary Table S5: collapsed groups and associations with vitamin D levels .....            | 8  |
| Non-linear analysis of serum vitamin D and rates of incident delirium diagnosis .....            | 9  |
| Supplementary Figure S3: Time-to-event model with smoothing spline function.....                 | 9  |
| Non-linear analysis of serum calcium and rates of incident delirium diagnosis .....              | 10 |
| Supplementary Figure S4: Time-to-event model with smoothing spline function.....                 | 10 |
| Mendelian Randomization full results .....                                                       | 11 |
| Supplementary Table S6: Expanded version of Table 3.....                                         | 11 |
| Mendelian Randomization stratified by date of diagnosis .....                                    | 12 |
| Supplementary Figure S5: Mendelian Randomization stratified by date of diagnosis.....            | 12 |
| Supplementary Table S7: Mendelian Randomization stratified by date of diagnosis .....            | 12 |
| References .....                                                                                 | 13 |

## Supplementary Methods

### Mendelian randomization analysis

Mendelian randomization (MR) analyses are used to determine whether an association between a risk factor (such as vitamin D) and an outcome (such as delirium) may share a causal pathway. If individuals carrying more vitamin D-increasing genetic variants have greater risk of delirium, this supports the hypothesis that there is a shared causal pathway. We previously applied these methods to an earlier version of the UK Biobank data (Bowman *et al.*, 2019) and extend the analysis using the longer follow-up now available ( $n=3,405$  delirium cases, up from 544 in our previous work).

Known genetic variants associated with circulating 25[OH]D concentration were extracted from a large meta-analysis by Jiang *et al.* (Jiang *et al.*, 2018) of 79,366 Europeans that did not include UK Biobank participants. Only one variant from each locus was included, and only if the final meta-analysis p value was  $<5 \times 10^{-8}$ ; all included variants had sufficient imputation quality [ $>0.4$ ] and were in Hardy-Weinberg equilibrium [ $p > 1 \times 10^{-6}$ ] in the UK Biobank participants.

The genome-wide association study described above was performed in individuals of European descent; we therefore restricted the genetic analysis in this study to UK Biobank participants of European descent ( $n=451,367$  of 487,442 with complete genetics data), the derivation of which is described previously (Thompson *et al.*, 2019). 326,558 participants met the above criteria for analysis (i.e. with complete vitamin D and delirium incidence data), had complete genetic data, and were of European ancestry.

The primary MR analysis used 6 genetic variants from the larger Jiang *et al.* (Jiang *et al.*, 2018) meta-analysis to determine whether there was evidence for a causal effect of vitamin D on delirium risk. A genetic risk score was computed by summing the number of vitamin D-increasing alleles each participant had, weighted by the reported effect on vitamin D levels (Jiang *et al.*, 2018). R (v4.0.2) package `MendelianRandomization` (v0.4.2) was used in the primary analysis to apply two-sample Mendelian Randomization analysis methods to test the association between serum vitamin D and delirium risk. This package tests whether the result is robust to several assumptions of the different models. First, penalized robust inverse-variance weighted (IVW) regression assumes there is no unbalanced horizontal pleiotropy. Secondly, the penalized weighted median estimate assumes less than 50% of the weight in the analysis comes from invalid instruments. Thirdly, penalized robust MR-Egger regression assumes the genetic variants' effect is not correlated with any pleiotropic effect on the outcome. Lastly, the intercept from the MR-Egger regression, unlike IVW the MR-Egger

intercept, is not fixed, and deviation from the null is used to test for possible horizontal pleiotropy. We used the output of the penalized robust IVW regression result as the primary analysis, checked the others for consistency of effect, and observed the MR-Egger intercept for evidence of no significant deviation from the null. In secondary analysis we examined whether the large effect vitamin D SNP rs3755967 was disproportionately affecting the results in two ways: firstly, R package `RadialMR` (v0.4)(Bowden *et al.*, 2018) was used to apply Radial IVW analysis (using default options) to investigate whether any SNPs were outliers, and secondly we repeated the primary IVW analysis excluding rs3755967.

To convert the IVW estimate to units of delirium HR per standard deviation (SD) change in genetically instrumented vitamin D, we used the mean (3.802) and SD (0.464) for logged vitamin D in the 351,320 UK Biobank participants. We multiplied the IVW estimate and CIs by 0.464, then exponentiated to get the estimate on the HR scale (logHR is required for MR analysis).

### **Additional and sensitivity analyses**

The time-to-event analysis between baseline risk factors and incident delirium were repeated using Fine and Gray competing risks regression(Jason P. Fine, 1999) to account for the competing risk of mortality: the same adjustments and specifications were used as described above in each case.

We performed additional analyses with adjustment for self-reported smoking status (at baseline) and highest education level attained to determine whether the association was confounded by tobacco exposure or socio-economic status (using education as a proxy).

Sensitivity analysis excluded a subset of participants (n=30,956, 8.8%) reporting taking vitamin D or multivitamin supplements at the baseline, either over the counter (data field 6155 (Vitamin and mineral supplements), using the code 4 (Vitamin D)) or prescribed (data field 20003 (Vitamin and mineral supplements), using the codes 1140852766 1140852948 1140870954 1140877612 1140852976 1140876592 1140909766 1141164602).

Serum calcium measurement (in mmol/L) was performed by Beckman Coulter AU5800 analyzer, with data available on 321,224 of the 351,320 participants eligible for the described analyses.

Increased rates of delirium diagnosis observed with vitamin D levels may be secondary to the effect of vitamin D deficiency on increased hospitalization from specific, relevant conditions. Sensitivity analyses excluded the following hospital-recorded diagnoses: bone fractures, chronic kidney disease

(CKD), dementia, liver disease (all known causes of delirium (Fong, Tulebaev and Inouye, 2009)), and Parkinson's (patients with Parkinson's are known to be at increased risk of delirium (Ebersbach *et al.*, 2019), and have lower bone mineral density with higher incidence of hip fractures (Critchley *et al.*, 2015)). See Supplementary Table S1 for ICD-10 codes.

Frail individuals are known to have increased risk of delirium (Quinlan *et al.*, 2011) so we utilized a validated Frailty Index (FI) for the UK Biobank (Williams *et al.*, 2019). The FI is a 49-item count of health deficits including disease diagnoses and disabilities, mental health, and wellbeing. Of these, 286,616 of 351,320 had complete data for the FI. We included FI as a continuous covariate in sensitivity analysis.

Since it is known that vitamin D levels are lower in non-white individuals but bioavailable levels are unchanged, current cut-offs for deficiency may have less significance in e.g. blacks compared to whites (Powe *et al.*, 2013). We therefore repeated the analysis on the 335,517 participants (96%) who self-reported as white.

Supplementary Table S1: ICD-10 codes for clinical conditions from the hospital inpatient data

| Outcome                | ICD-10 code(s)                                                                            |
|------------------------|-------------------------------------------------------------------------------------------|
| Delirium               | F05*                                                                                      |
| Bone fracture          | S02*; S12*; S22*; S32*; S42*; S52*; S62*; S72*; S82*; S92*; T02*; T08*; T10*; T12*; T14.2 |
| Chronic kidney disease | N18; N183; N184; N185; Y841                                                               |
| Dementia               | F00*; F01*; F02*; F03*; G30*                                                              |
| Liver disease          | K70-K77*                                                                                  |
| Parkinson's disease    | G20; F02.3                                                                                |

Supplementary Figure S1: Cohort flowchart

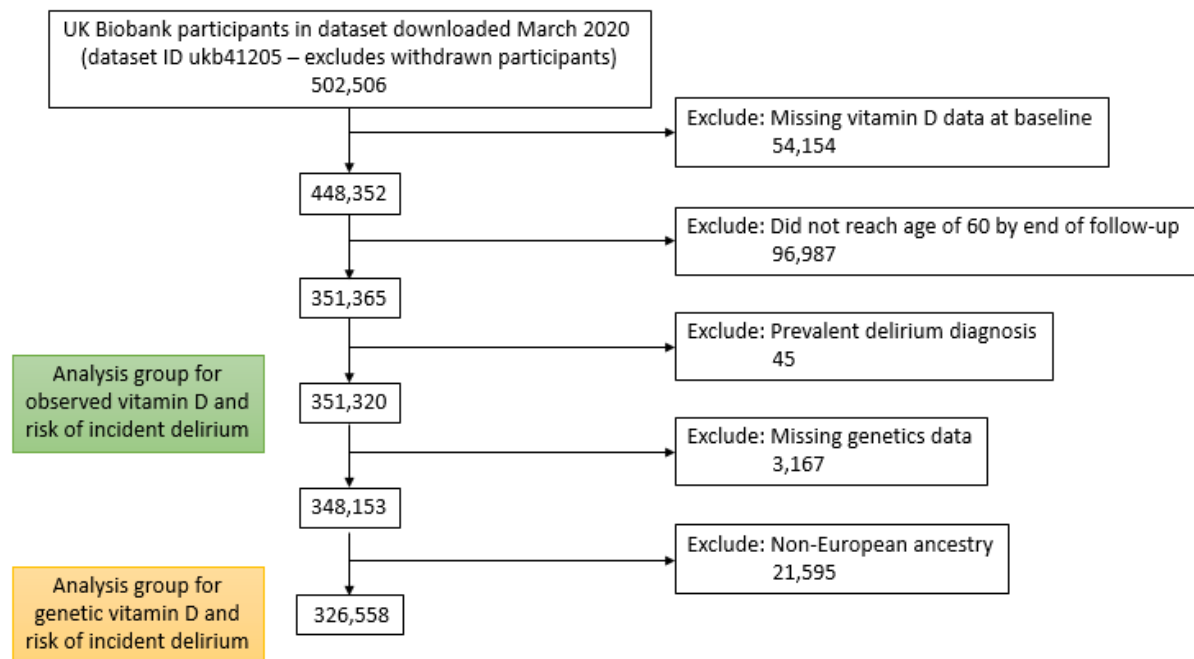

## Supplementary Results

### Seasonal variation in vitamin D

Supplementary Table S2: vitamin D levels associated with assessment month

| Assessment month | N      | %     | Coef.      | 95% CIs |        | p          |
|------------------|--------|-------|------------|---------|--------|------------|
| Jan              | 23,878 | 6.8   | <i>ref</i> |         |        |            |
| Feb              | 27,788 | 7.91  | -0.806     | -1.099  | -0.512 | 7.5*10-8   |
| Mar              | 33,856 | 9.64  | -0.531     | -0.813  | -0.250 | 2.1*10-4   |
| Apr              | 30,502 | 8.68  | 1.648      | 1.360   | 1.935  | 2.7*10-29  |
| May              | 36,213 | 10.31 | 6.236      | 5.958   | 6.514  | <1*10-324  |
| Jun              | 36,666 | 10.44 | 13.607     | 13.327  | 13.887 | <1*10-324  |
| Jul              | 30,817 | 8.77  | 18.188     | 17.897  | 18.479 | <1*10-324  |
| Aug              | 27,516 | 7.83  | 19.346     | 19.045  | 19.647 | <1*10-324  |
| Sep              | 25,268 | 7.19  | 18.823     | 18.519  | 19.127 | <1*10-324  |
| Oct              | 30,251 | 8.61  | 13.958     | 13.667  | 14.250 | <1*10-324  |
| Nov              | 29,106 | 8.28  | 7.747      | 7.456   | 8.038  | <1*10-324  |
| Dec              | 19,459 | 5.54  | 4.173      | 3.853   | 4.494  | 3.0*10-143 |

Note: Linear regression models with independent variables age, sex, assessment centre, assessment month and ethnicity

Supplementary Figure S2: Boxplot of vitamin D by assessment month

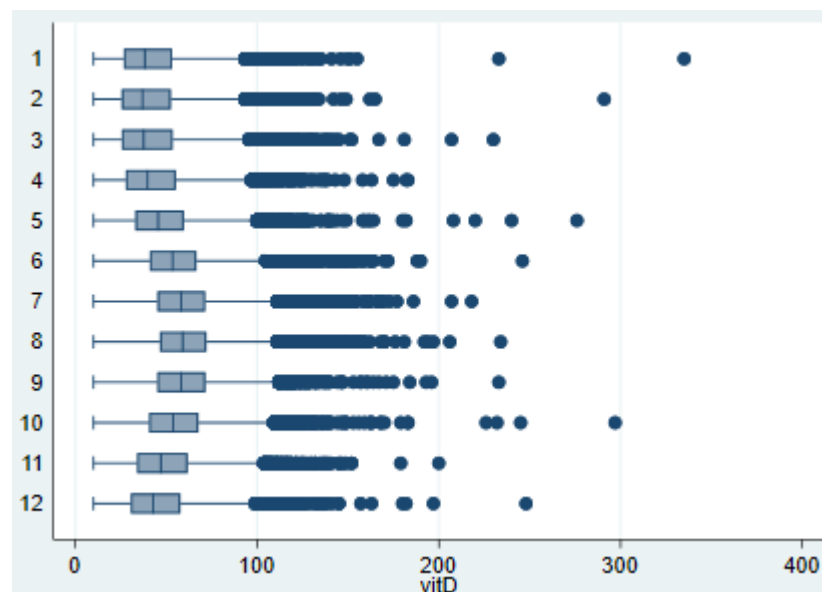

## Vitamin D variation and assessment centre

Supplementary Table S3: Vitamin D variation by assessment centre

| Assessment centre | N      | %    | Coef.      | 95% CIs |        | p        |
|-------------------|--------|------|------------|---------|--------|----------|
| Leeds             | 31,595 | 8.99 | <i>ref</i> |         |        |          |
| Manchester        | 10,167 | 2.89 | -0.891     | -1.275  | -0.507 | 5.4E-06  |
| Oxford            | 11,000 | 3.13 | 1.078      | 0.694   | 1.461  | 3.5E-08  |
| Cardiff           | 11,637 | 3.31 | 2.324      | 1.974   | 2.675  | 1.4E-38  |
| Glasgow           | 12,167 | 3.46 | -4.756     | -5.104  | -4.409 | 3.0E-158 |
| Edinburgh         | 11,165 | 3.18 | -4.210     | -4.570  | -3.850 | 3.0E-116 |
| Stoke             | 14,710 | 4.19 | 0.393      | 0.052   | 0.734  | 2.4E-02  |
| Reading           | 21,448 | 6.1  | 1.861      | 1.562   | 2.159  | 2.8E-34  |
| Bury              | 21,589 | 6.15 | 0.293      | -0.008  | 0.594  | 5.6E-02  |
| Newcastle         | 27,215 | 7.75 | -1.064     | -1.345  | -0.783 | 1.1E-13  |
| Bristol           | 29,751 | 8.47 | 2.174      | 1.903   | 2.445  | 9.9E-56  |
| Barts             | 8,116  | 2.31 | -1.598     | -2.003  | -1.193 | 1.0E-14  |
| Nottingham        | 24,667 | 7.02 | 0.886      | 0.598   | 1.175  | 1.7E-09  |
| Sheffield         | 21,183 | 6.03 | 1.593      | 1.294   | 1.891  | 1.3E-25  |
| Liverpool         | 23,496 | 6.69 | 1.300      | 1.009   | 1.591  | 2.1E-18  |
| Middlesborough    | 15,072 | 4.29 | 1.397      | 1.063   | 1.732  | 2.6E-16  |
| Hounslow          | 19,329 | 5.5  | 0.866      | 0.562   | 1.170  | 2.4E-08  |
| Croydon           | 18,606 | 5.3  | 0.335      | 0.026   | 0.645  | 3.4E-02  |
| Birmingham        | 16,706 | 4.76 | -0.351     | -0.668  | -0.034 | 3.0E-02  |
| Swansea           | 1,315  | 0.37 | 1.895      | 1.014   | 2.776  | 2.5E-05  |
| Wrexham           | 386    | 0.11 | 1.199      | -0.376  | 2.773  | 1.4E-01  |

Note: Linear regression models with independent variables age, sex, assessment centre, assessment month and ethnicity

## Vitamin D variation and self-reported ethnic group

Supplementary Table S4: UK Biobank ethnic group coding

| Ethnic background          | UKB code | Collapsed groups for analysis |
|----------------------------|----------|-------------------------------|
| Missing                    | .        | <i>Missing</i>                |
| Prefer not to answer       | -3       | <i>Missing</i>                |
| Do not know                | -1       | <i>Missing</i>                |
| White                      | 1        | White                         |
| Mixed                      | 2        | Mixed                         |
| Asian or Asian British     | 3        | Asian                         |
| Black or Black British     | 4        | Black                         |
| Chinese                    | 5        | Asian                         |
| Other ethnic group         | 6        | Other                         |
| British                    | 1001     | White                         |
| Irish                      | 1002     | White                         |
| Any other white background | 1003     | White                         |
| White and Black Caribbean  | 2001     | Mixed                         |
| White and Black African    | 2002     | Mixed                         |
| White and Asian            | 2003     | Mixed                         |
| Any other mixed background | 2004     | Mixed                         |
| Indian                     | 3001     | Asian                         |
| Pakistani                  | 3002     | Asian                         |
| Bangladeshi                | 3003     | Asian                         |
| Any other Asian background | 3004     | Asian                         |
| Caribbean                  | 4001     | Black                         |
| African                    | 4002     | Black                         |
| Any other Black background | 4003     | Black                         |

Supplementary Table S5: collapsed groups and associations with vitamin D levels

| Ethnic background, collapsed groups             | N       | %    | Coef.      | 95% CIs |        | p                      |
|-------------------------------------------------|---------|------|------------|---------|--------|------------------------|
| <i>White</i>                                    | 335,517 | 95.5 | <i>ref</i> |         |        |                        |
| <i>Asian</i>                                    | 6,135   | 1.8  | -20.88     | -21.28  | -20.48 | <1*10 <sup>-324</sup>  |
| <i>Black</i>                                    | 4,121   | 1.2  | -14.49     | -14.95  | -14.04 | <1*10 <sup>-324</sup>  |
| <i>Other</i>                                    | 2,486   | 0.7  | -13.45     | -14.05  | -12.84 | <1*10 <sup>-324</sup>  |
| <i>Mixed</i>                                    | 1,469   | 0.4  | -8.67      | -9.41   | -7.94  | 8.0*10 <sup>-118</sup> |
| <i>Prefer not to answer/Do not know/Missing</i> | 1,592   | 0.5  | -8.31      | -9.13   | -7.48  | 7.5*10 <sup>-87</sup>  |

Note: Linear regression models with independent variables age, sex, assessment centre, assessment month and ethnicity

### Non-linear analysis of serum vitamin D and rates of incident delirium diagnosis

Supplementary Figure S3: Time-to-event model with smoothing spline function

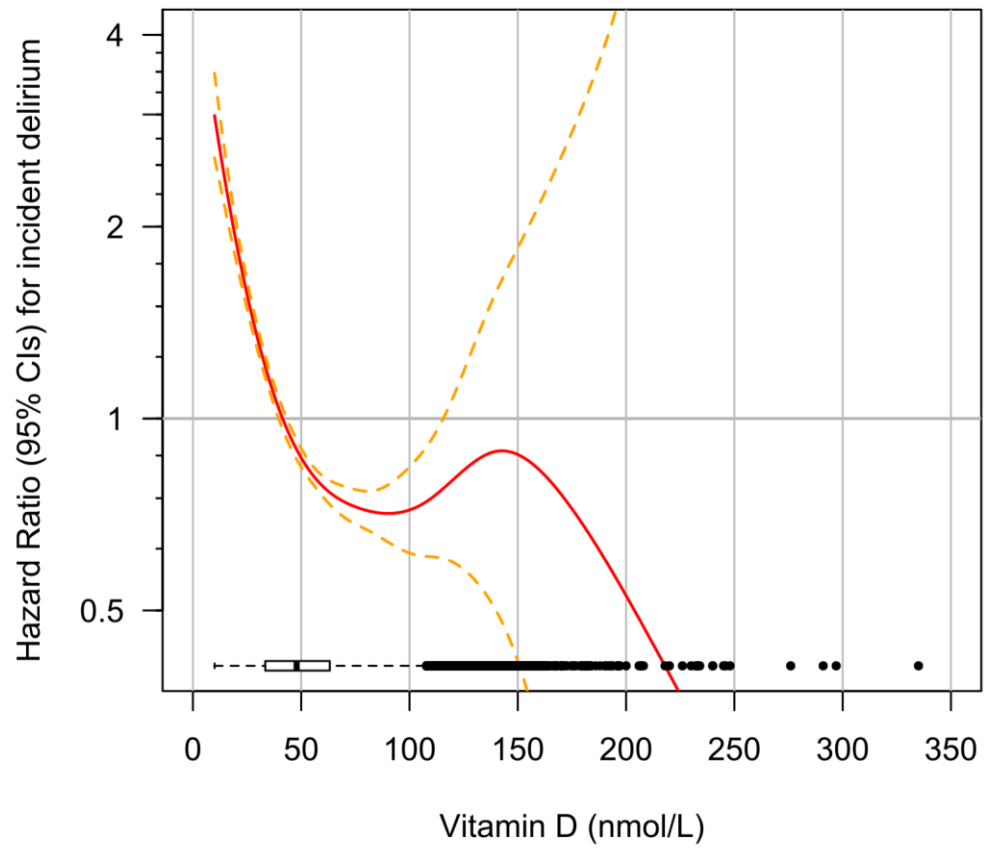

## Non-linear analysis of serum calcium and rates of incident delirium

Supplementary Figure S4: Time-to-event model with smoothing spline function

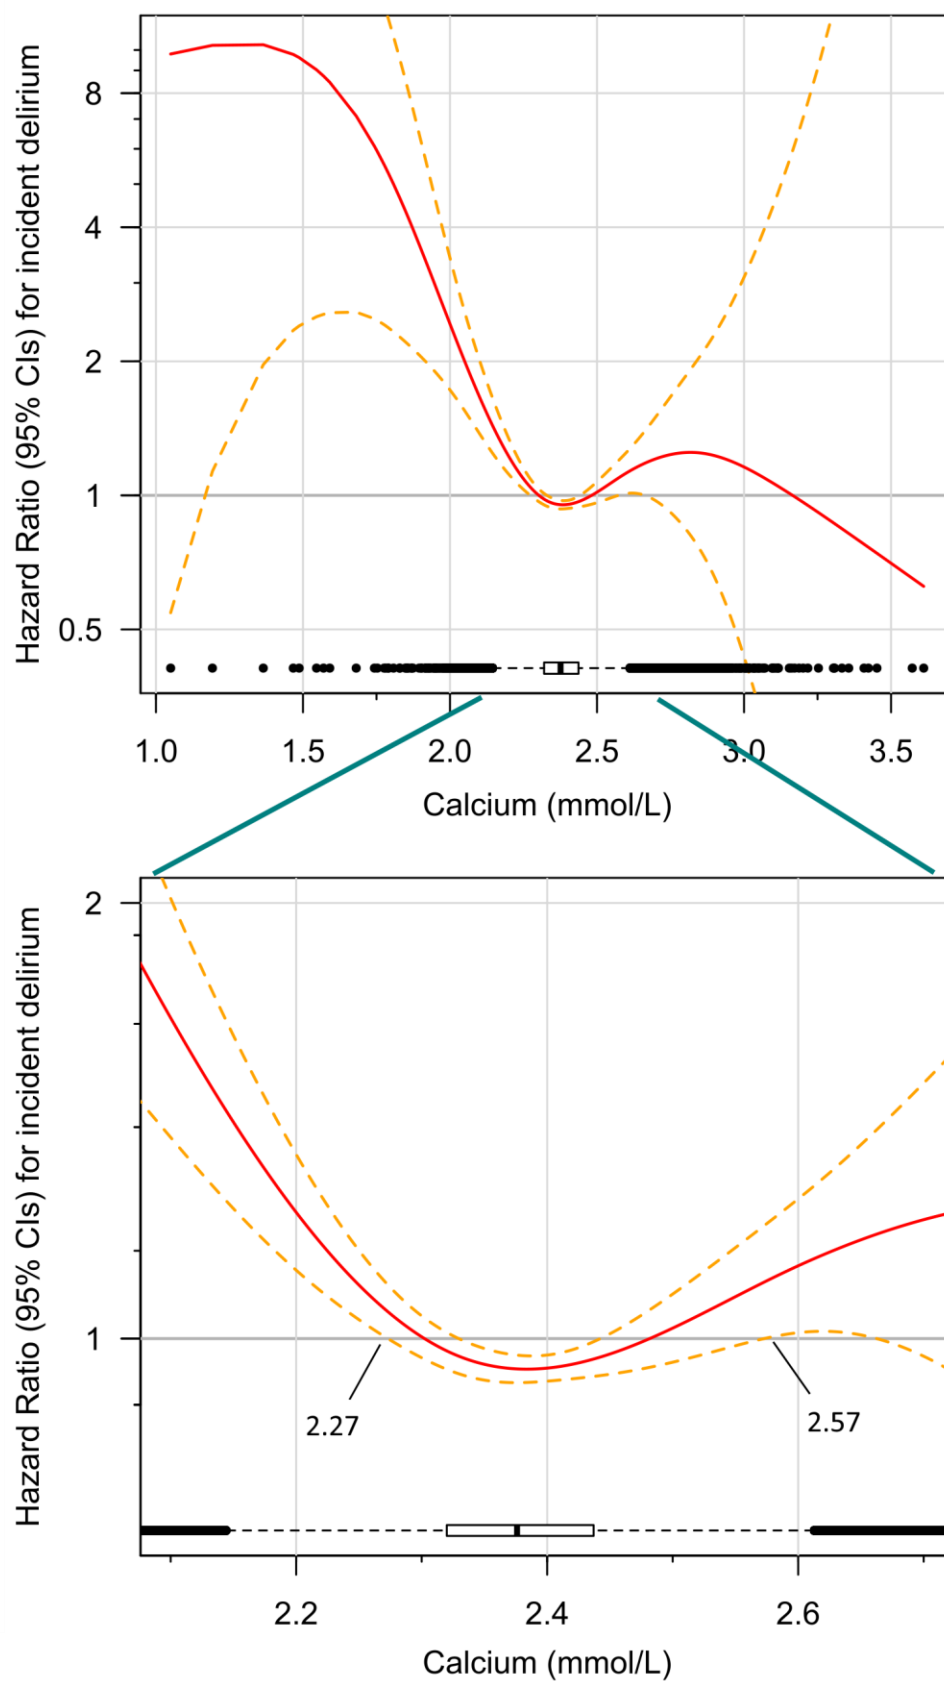

## Mendelian Randomization full results

Supplementary Table S6: Expanded version of Table 3.

| R package                                       | Method                      | Estimate | Std Error | 95% CI  |         | P-value  |
|-------------------------------------------------|-----------------------------|----------|-----------|---------|---------|----------|
| MendelianRandomization                          | Simple median               | -0.6382  | 0.4181    | -1.4578 | 0.1814  | 1.27E-01 |
|                                                 | Weighted median             | -0.5098  | 0.2578    | -1.0150 | -0.0046 | 4.79E-02 |
|                                                 | Penalized weighted median   | -0.5098  | 0.2578    | -1.0150 | -0.0046 | 4.79E-02 |
|                                                 | IVW                         | -0.4802  | 0.2420    | -0.9546 | -0.0059 | 4.72E-02 |
|                                                 | Penalized IVW               | -0.4802  | 0.2420    | -0.9546 | -0.0059 | 4.72E-02 |
|                                                 | Robust IVW                  | -0.4837  | 0.0924    | -0.6648 | -0.3027 | 1.64E-07 |
|                                                 | Penalized robust IVW        | -0.4837  | 0.0924    | -0.6648 | -0.3027 | 1.64E-07 |
|                                                 | MR-Egger                    | -0.4167  | 0.4234    | -1.2466 | 0.4132  | 3.25E-01 |
|                                                 | (intercept)                 | -0.0036  | 0.0195    | -0.0418 | 0.0346  | 8.55E-01 |
|                                                 | Penalized MR-Egger          | -0.4167  | 0.4234    | -1.2466 | 0.4132  | 3.25E-01 |
|                                                 | (intercept)                 | -0.0036  | 0.0195    | -0.0418 | 0.0346  | 8.55E-01 |
|                                                 | Robust MR-Egger             | -0.4146  | 0.1609    | -0.7300 | -0.0992 | 9.98E-03 |
|                                                 | (intercept)                 | -0.0040  | 0.0128    | -0.0291 | 0.0211  | 7.55E-01 |
|                                                 | Penalized robust MR-Egger   | -0.4146  | 0.1609    | -0.7300 | -0.0992 | 9.98E-03 |
|                                                 | (intercept)                 | -0.0040  | 0.0128    | -0.0291 | 0.0211  | 7.55E-01 |
| RadialMR                                        | Effect (Mod.2nd)            | -0.4802  | 0.1449    | -0.7642 | -0.1961 | 9.23E-04 |
|                                                 | Iterative                   | -0.4802  | 0.1449    | -0.7642 | -0.1961 | 9.23E-04 |
|                                                 | Exact (FE)                  | -0.4805  | 0.2422    | -0.9553 | -0.0057 | 4.73E-02 |
|                                                 | Exact (RE)                  | -0.4805  | 0.1665    | -0.8069 | -0.1542 | 3.43E-02 |
|                                                 | Radial MR-Egger             | -0.4868  | 0.2681    | -1.0124 | 0.0388  | 1.44E-01 |
|                                                 | Radial MR-Egger (intercept) | 0.0140   | 0.4519    | -0.8717 | 0.8998  | 9.77E-01 |
| MendelianRandomization<br>(excluding rs3755967) | Simple median               | -0.7715  | 0.6416    | -2.0289 | 0.4860  | 2.29E-01 |
|                                                 | Weighted median             | -0.4262  | 0.5423    | -1.4892 | 0.6367  | 4.32E-01 |
|                                                 | Penalized weighted median   | -0.4262  | 0.5423    | -1.4892 | 0.6367  | 4.32E-01 |
|                                                 | IVW                         | -0.4121  | 0.4690    | -1.3313 | 0.5071  | 3.80E-01 |
|                                                 | Penalized IVW               | -0.4121  | 0.4690    | -1.3313 | 0.5071  | 3.80E-01 |
|                                                 | Robust IVW                  | -0.4146  | 0.3043    | -1.0111 | 0.1819  | 1.73E-01 |
|                                                 | Penalized robust IVW        | -0.4146  | 0.3043    | -1.0111 | 0.1819  | 1.73E-01 |
|                                                 | MR-Egger                    | 0.6809   | 1.5899    | -2.4352 | 3.7969  | 6.68E-01 |
|                                                 | (intercept)                 | -0.0303  | 0.0421    | -0.1127 | 0.0522  | 4.72E-01 |
|                                                 | Penalized MR-Egger          | 0.6809   | 1.5899    | -2.4352 | 3.7969  | 6.68E-01 |
|                                                 | (intercept)                 | -0.0303  | 0.0421    | -0.1127 | 0.0522  | 4.72E-01 |
|                                                 | Robust MR-Egger             | 0.6903   | 0.5999    | -0.4856 | 1.8662  | 2.50E-01 |
|                                                 | (intercept)                 | -0.0307  | 0.0134    | -0.0569 | -0.0044 | 2.19E-02 |
|                                                 | Penalized robust MR-Egger   | 0.6903   | 0.5999    | -0.4856 | 1.8662  | 2.50E-01 |
|                                                 | (intercept)                 | -0.0307  | 0.0134    | -0.0569 | -0.0044 | 2.19E-02 |

## Mendelian Randomization stratified by date of diagnosis

Although the effect of vitamin D-associated variants on risk of delirium overall is consistent with our previous report using hospital admissions data up to Feb 2016 (Bowman *et al.*, 2019), in sensitivity analysis using only the “new” diagnoses up to March 2020 not included in the previous analysis the association is attenuated (n cases old hes = 544, n cases new hes = 2,861).

Supplementary Figure S5: Mendelian Randomization stratified by date of diagnosis

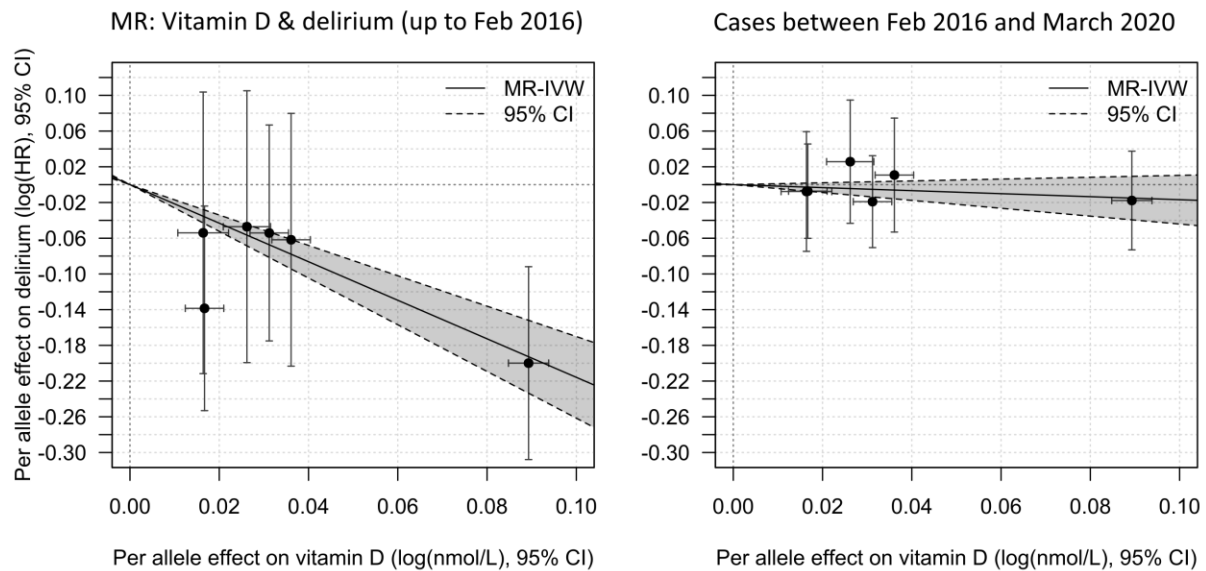

Supplementary Table S7: Mendelian Randomization stratified by date of diagnosis

| Method                    | HES up to Feb 2016 |        |         |         | HES Feb 2016 to March 2020 |        |         |         |
|---------------------------|--------------------|--------|---------|---------|----------------------------|--------|---------|---------|
|                           | Estimate           | 95% CI | P-value |         | Estimate                   | 95% CI | P-value |         |
| Simple median             | -2.02              | -4.06  | 0.02    | 5.2E-02 | -0.32                      | -1.24  | 0.61    | 5.0E-01 |
| Weighted median           | -2.16              | -3.29  | -1.03   | 1.8E-04 | -0.20                      | -0.77  | 0.36    | 4.8E-01 |
| Penalized weighted median | -2.16              | -3.29  | -1.03   | 1.8E-04 | -0.20                      | -0.77  | 0.36    | 4.8E-01 |
| IVW                       | -2.31              | -3.37  | -1.24   | 2.3E-05 | -0.16                      | -0.69  | 0.37    | 5.5E-01 |
| Penalized IVW             | -2.31              | -3.37  | -1.24   | 2.3E-05 | -0.16                      | -0.69  | 0.37    | 5.5E-01 |
| Robust IVW                | -2.16              | -2.62  | -1.70   | 2.2E-20 | -0.17                      | -0.44  | 0.10    | 2.3E-01 |
| Penalized robust IVW      | -2.16              | -2.62  | -1.70   | 2.2E-20 | -0.17                      | -0.44  | 0.10    | 2.3E-01 |
| MR-Egger                  | -1.62              | -3.49  | 0.25    | 9.0E-02 | -0.20                      | -1.12  | 0.73    | 6.8E-01 |
| (intercept)               | -0.04              | -0.13  | 0.05    | 3.8E-01 | 0.00                       | -0.04  | 0.04    | 9.3E-01 |
| Penalized MR-Egger        | -1.62              | -3.49  | 0.25    | 9.0E-02 | -0.20                      | -1.12  | 0.73    | 6.8E-01 |
| (intercept)               | -0.04              | -0.13  | 0.05    | 3.8E-01 | 0.00                       | -0.04  | 0.04    | 9.3E-01 |
| Robust MR-Egger           | -2.31              | -3.20  | -1.43   | 3.2E-07 | -0.19                      | -0.44  | 0.05    | 1.3E-01 |
| (intercept)               | 0.01               | -0.06  | 0.08    | 7.6E-01 | 0.00                       | -0.02  | 0.03    | 9.1E-01 |
| Penalized robust MR-Egger | -2.31              | -3.20  | -1.43   | 3.2E-07 | -0.19                      | -0.44  | 0.05    | 1.3E-01 |
| (intercept)               | 0.01               | -0.06  | 0.08    | 7.6E-01 | 0.00                       | -0.02  | 0.03    | 9.1E-01 |

Results from `MendelianRandomization` R package

## References

- Bowden, J. *et al.* (2018) 'Improving the visualization, interpretation and analysis of two-sample summary data Mendelian randomization via the Radial plot and Radial regression', *International Journal of Epidemiology*, 47(4), pp. 1264–1278. doi: 10.1093/ije/dyy101.
- Bowman, K. *et al.* (2019) 'Vitamin D levels and risk of delirium: A mendelian randomization study in the UK Biobank.', *Neurology*, 92(12), pp. e1387–e1394. doi: 10.1212/WNL.0000000000007136.
- Critchley, R. J. *et al.* (2015) 'Occurrence, management and outcomes of hip fractures in patients with Parkinson's disease: Fig. 1', *British Medical Bulletin*, 115(1), pp. 135–142. doi: 10.1093/bmb/ldv029.
- Ebersbach, G. *et al.* (2019) 'Management of delirium in Parkinson's disease', *Journal of Neural Transmission*, 126(7), pp. 905–912. doi: 10.1007/s00702-019-01980-7.
- Fong, T. G., Tulebaev, S. R. and Inouye, S. K. (2009) 'Delirium in elderly adults: diagnosis, prevention and treatment.', *Nature reviews. Neurology*. NIH Public Access, 5(4), pp. 210–20. doi: 10.1038/nrneurol.2009.24.
- Jason P. Fine, R. J. G. (1999) 'A Proportional Hazards Model for the Subdistribution of a Competing Risk', *Journal of the American Statistical Association*, 94(446), pp. 496–509. doi: 10.1080/01621459.1999.10474144.
- Jiang, X. *et al.* (2018) 'Genome-wide association study in 79,366 European-ancestry individuals informs the genetic architecture of 25-hydroxyvitamin D levels', *Nature Communications*, 9(1), p. 260. doi: 10.1038/s41467-017-02662-2.
- Powe, C. E. *et al.* (2013) 'Vitamin D-binding protein and vitamin D status of black Americans and white Americans.', *The New England journal of medicine*, 369(21), pp. 1991–2000. doi: 10.1056/NEJMoa1306357.
- Quinlan, N. *et al.* (2011) 'Vulnerability: The crossroads of frailty and delirium', *Journal of the American Geriatrics Society*, 59(SUPPL. 2), pp. 262–268. doi: 10.1111/j.1532-5415.2011.03674.x.
- Thompson, W. D. *et al.* (2019) 'Association of maternal circulating 25(OH)D and calcium with birth weight: A mendelian randomisation analysis.', *PLoS medicine*, 16(6), p. e1002828. doi: 10.1371/journal.pmed.1002828.
- Williams, D. M. *et al.* (2019) 'A Frailty Index for UK Biobank Participants', *The Journals of Gerontology: Series A*, 74(4), pp. 582–587. doi: 10.1093/gerona/gly094.
